# Supplementary material for: Nonreciprocal and Conditional Cooperativity Directs the Pioneer Activity of Pluripotency Transcription Factors
Source: PubMed Central journal article supplement — Cell Rep. Author manuscript; Available in PMC 2019 Sep 18. (PMC6750763; doi:10.1016/j.celrep.2019.07.103), 2019-09-03
Supplement: NIHMS1539135-supplement-1.pdf [file NIHMS1539135-supplement-1.pdf]

**Cell Reports, Volume 28**

**Supplemental Information**

**Nonreciprocal and Conditional Cooperativity**

**Directs the Pioneer Activity**

**of Pluripotency Transcription Factors**

**Sai Li, Eric Bo Zheng, Li Zhao, and Shixin Liu**

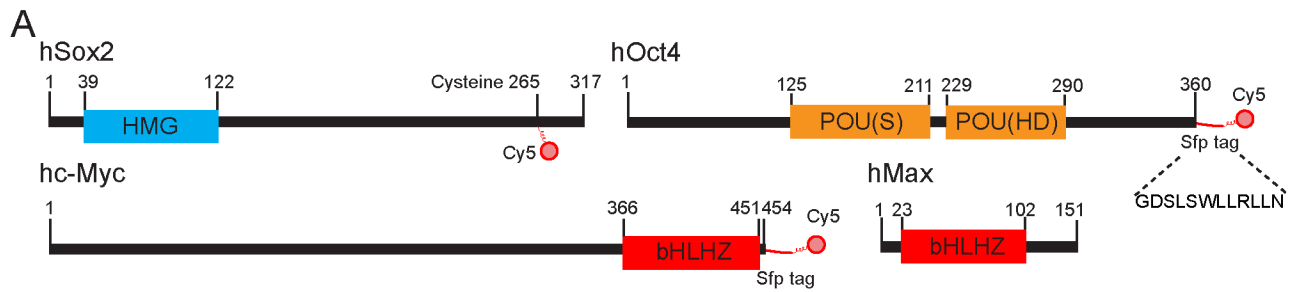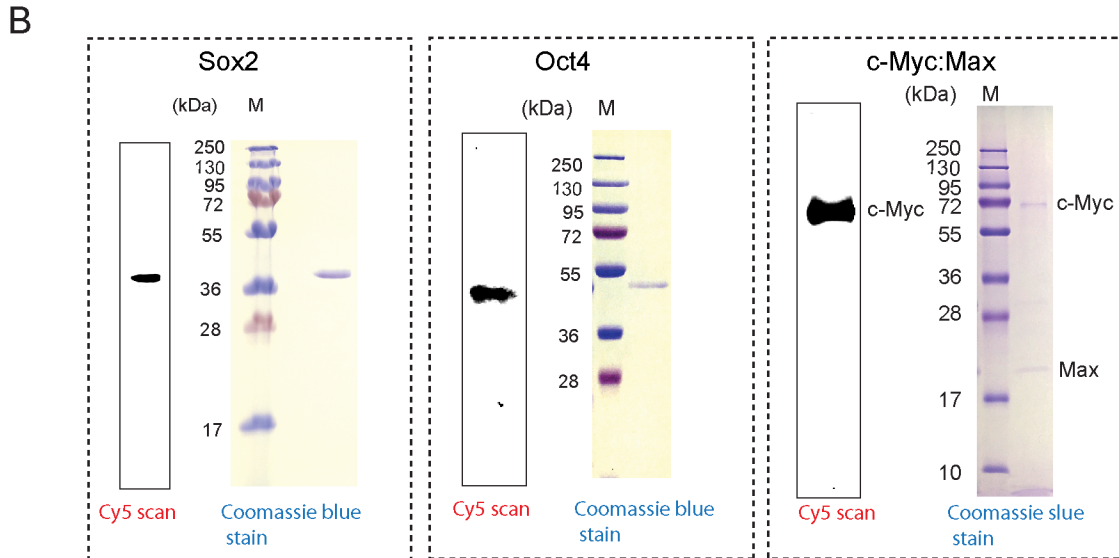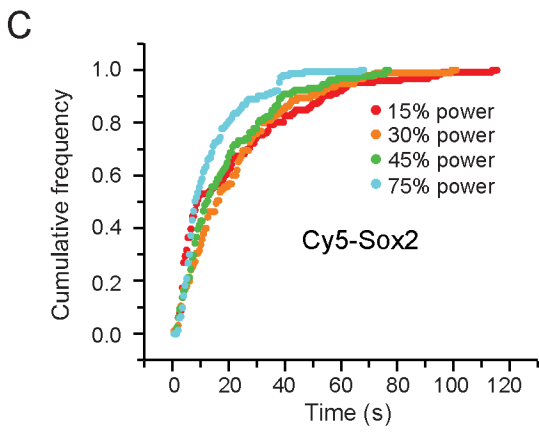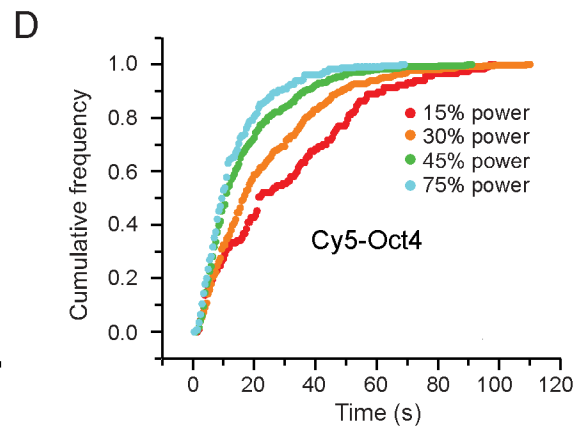

**Figure S1. Site-Specific Labeling of Pluripotency TFs and Photobleaching Kinetics of Fluorescently Labeled TFs, Related to Figures 1 and 3**

(A) Schematic of the full-length human Sox2, Oct4, c-Myc and Max proteins. Their DNA-binding domains are indicated.

(B) SDS-PAGE analysis of Cy5-labeled Sox2, Oct4, and c-Myc:Max heterodimer.

(C) Cumulative distributions of the observed Cy5-labeled Sox2 residence time on DNA measured at different levels of laser power.

(D) Same as (C) except for analyzing Cy5-labeled Oct4. In (C) and (D), the photobleaching rate constant ( $k_{\text{bleach}}$ ) is assumed to be linearly dependent on the laser power at non-saturating conditions. As such,

$k_{\text{bleach}}$  can be calculated by solving  $k_{\text{off,obs}} = k_{\text{bleach}} + k_{\text{off}}$  at multiple laser powers, with  $k_{\text{off,obs}}$  and  $k_{\text{off}}$  representing the observed TF dissociation rate constant and the true dissociation rate constant, respectively. At 30% power, the time constants for Cy5-Sox2 photobleaching and Cy5-Oct4 photobleaching are calculated to be 75 s and 42 s, respectively.

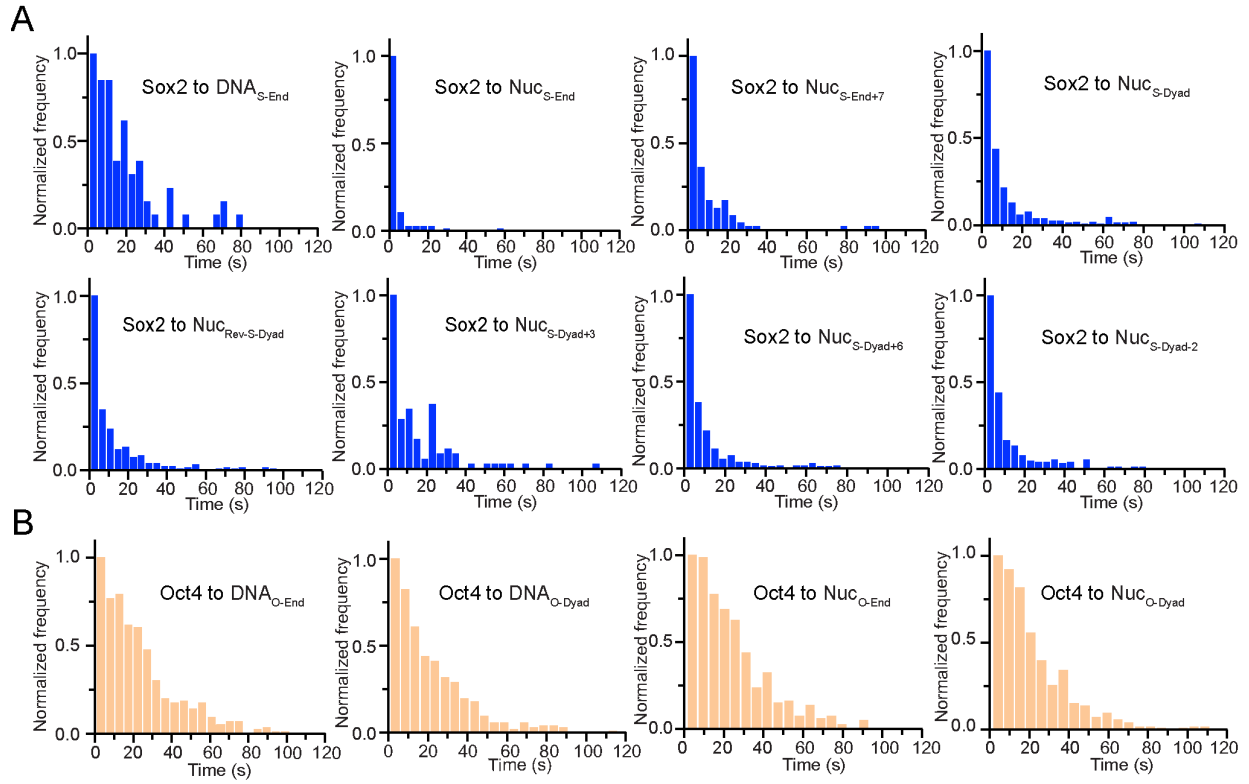

**Figure S2. Histograms of TF residence time on different DNA and nucleosome substrates, Related to Figures 1, 2, and 3**

(A) Histograms of Sox2 residence time.

(B) Histograms of Oct4 residence time.

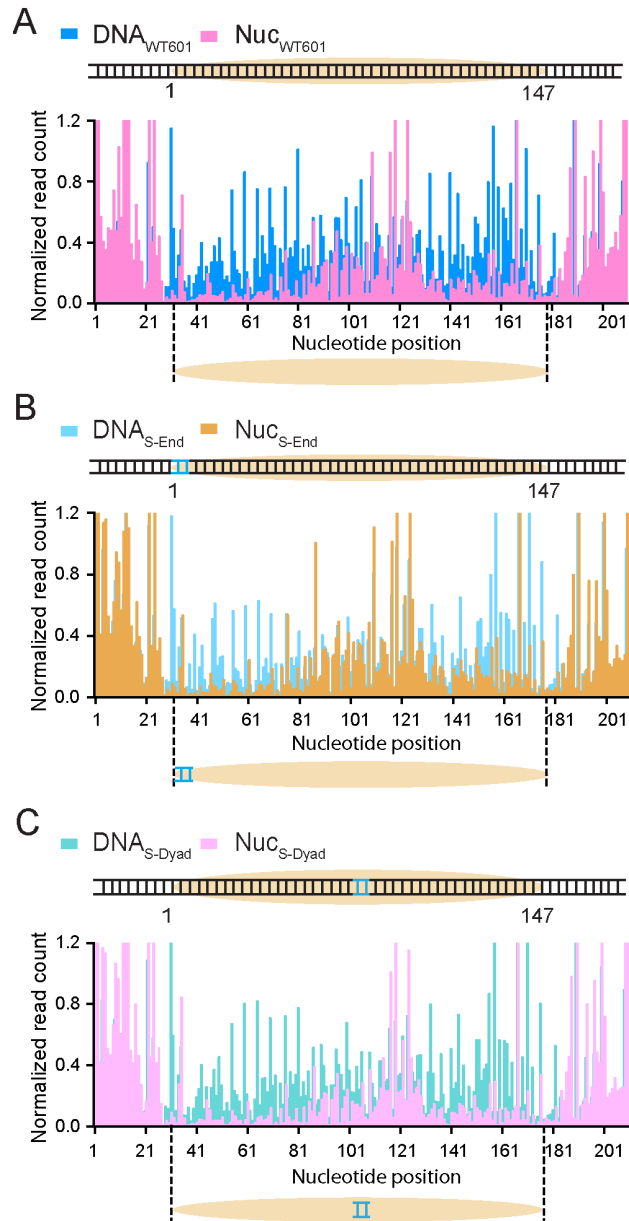

**Figure S3. Evaluating Nucleosome Positioning Using DNase Footprinting, Related to Figures 1 and 2**  
 (A) DNase I footprinting pattern for a DNA substrate containing a wildtype 601 NPS (DNA<sub>WT601</sub>, blue) or a mononucleosome substrate reconstituted from the same DNA template (Nuc<sub>WT601</sub>, pink). The DNase-protected region in the Nuc<sub>WT601</sub> data reflects the position of the nucleosome.  
 (B) Same as (A), except with a DNA template containing a 7-bp-long Sox2 binding motif placed at the end of the 601 NPS (DNA<sub>S-End</sub>, light blue; Nuc<sub>S-End</sub>, brown).  
 (C) Same as (A), except with a DNA template containing a Sox2 binding motif placed at the dyad of the 601 NPS (DNA<sub>S-Dyad</sub>, light green; Nuc<sub>S-Dyad</sub>; light pink).  
 All three nucleosome constructs share a similar protection pattern, suggesting that nucleosome positioning is not perturbed by the engineered TF binding motifs.

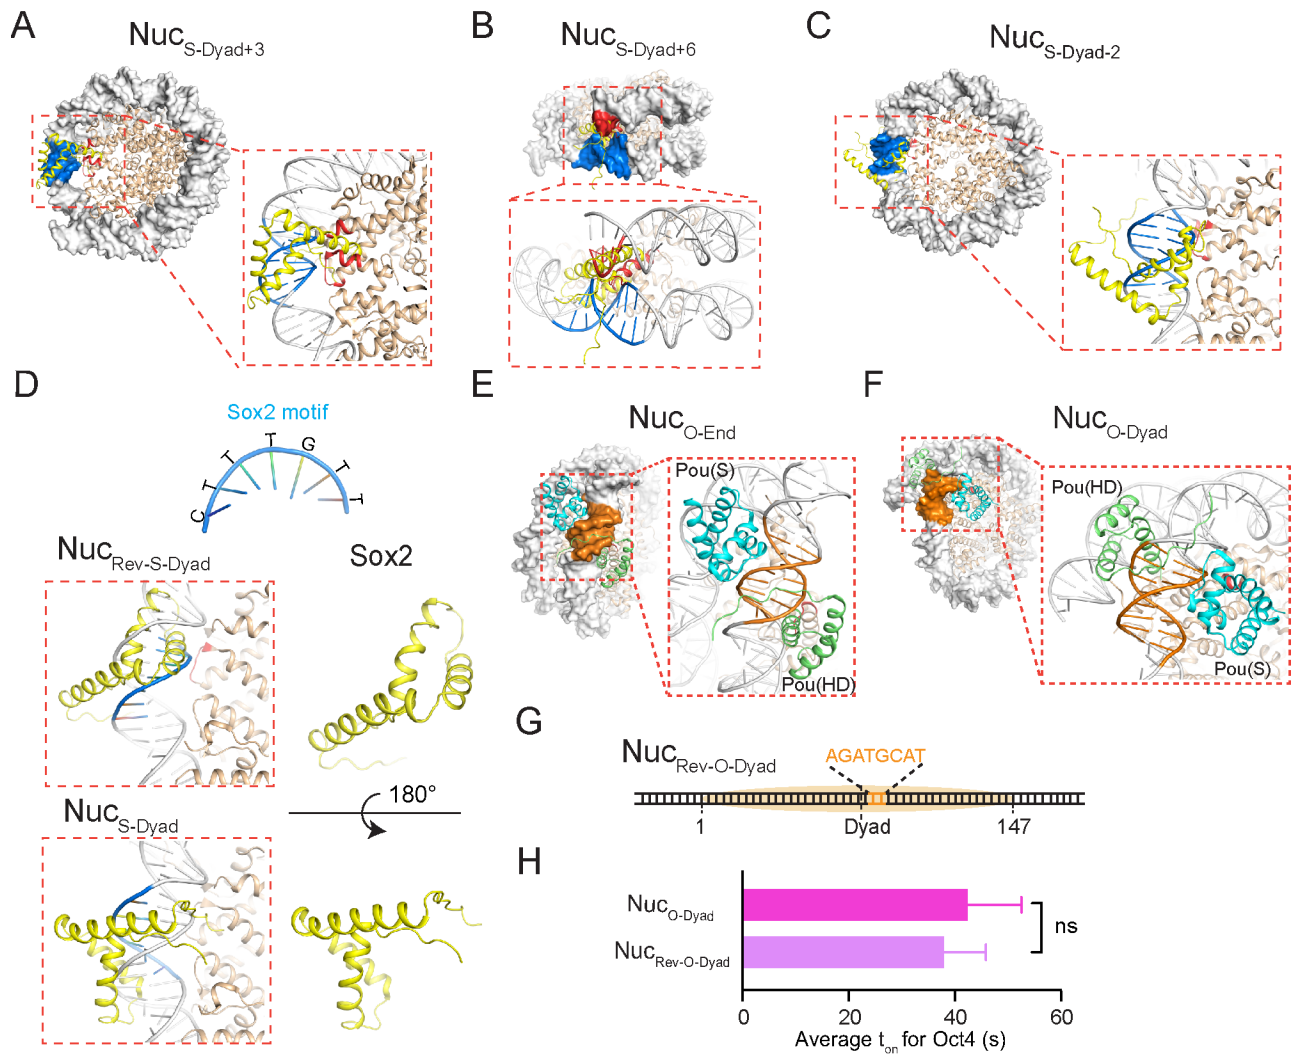

**Figure S4. Additional Structural Modeling and Kinetic Analysis of Sox2 and Oct4 Binding to Nucleosome Substrates, Related to Figures 2 and 3**

(A-C) The Sox2<sub>HMG</sub>:DNA structure (PDB: 1GT0; yellow) superimposed on the 601 nucleosome structure (PDB: 3LZ0) aligned by the DNA motif (blue) located at the dyad+3 (A), dyad+6 (B), or dyad-2 (C) position. Steric clash between Sox2 and the nucleosome is highlighted in red.

(D) Sox2<sub>HMG</sub>:DNA structure superimposed on a 601 nucleosome with a Sox2 binding motif CTTTGT (blue) encoded in either the Watson or the Crick strand at the dyad position. In both cases the minor groove of the binding site faces outward, but Sox2 binds in mirrored directions.

(E and F) Superposition between the Oct4<sub>POU</sub>:DNA structure (PDB: 1GT0) and the 601 nucleosome structure (PDB: 3LZ0) aligned by the DNA motif (orange) located at the end (E) or dyad (F) position. The Oct4 POU<sub>HD</sub> and POU<sub>S</sub> domains are shown in green and cyan, respectively.

(G) Diagram of the nucleosome substrate (Nuc<sub>Rev-O-Dyad</sub>) containing a reverse Oct4 binding motif near the dyad.

(H) Average Oct4 residence times on Nuc<sub>O-Dyad</sub> and Nuc<sub>Rev-O-Dyad</sub>.

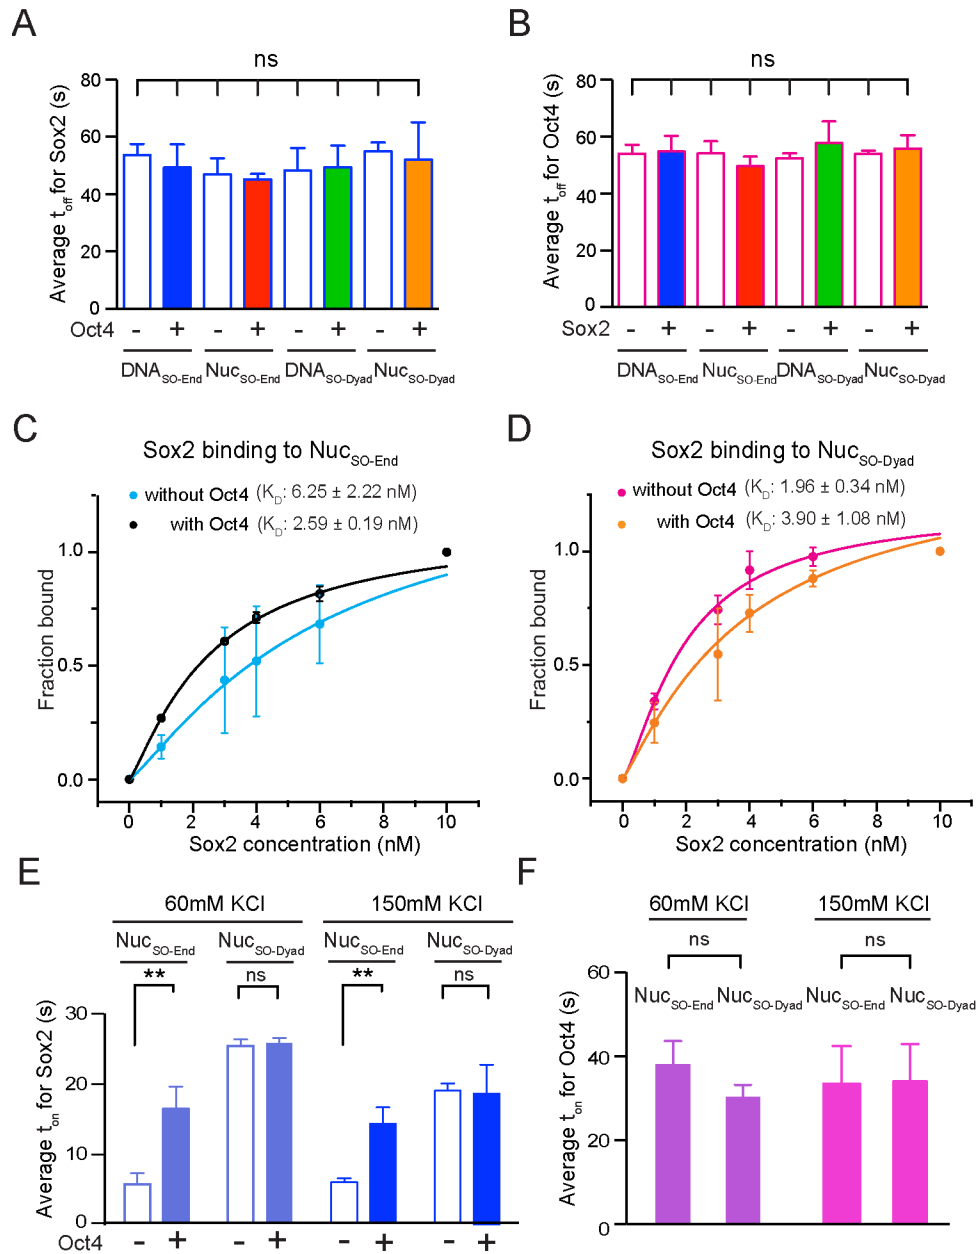

**Figure S5. Additional Quantification of Sox2- and Oct4-Nucleosome Interactions, Related to Figures 4, 5, and 6**

(A) Average waiting time ( $t_{\text{off}}$ ) before Sox2 binding to a DNA or nucleosome substrate containing a composite Sox2:Oct4 motif, in the absence or presence of Oct4.

(B) Average waiting time before Oct4 binding to the same substrates as in (A) in the absence or presence of Sox2.

(C) Fraction of Nuc<sub>SO-End</sub> substrates that were bound to Sox2 as a function of Sox2 concentration in the absence (blue circles) or presence (black circles) of 10 nM Oct4.  $K_D$  values were determined by fitting the data to a Hill function (blue and black curves). Hill coefficient  $n_{\text{Hill}} = 1.2 \pm 0.1$  without Oct4 and  $1.2 \pm 0.1$  with Oct4.

(D) Same as (C), except for analyzing the Sox2:Nuc<sub>SO-Dyad</sub> interaction.  $n_{\text{Hill}} = 1.4 \pm 0.2$  without Oct4 and  $1.2 \pm 0.2$  with Oct4.

(E) Average residence times ( $t_{\text{on}}$ ) of Sox2 on Nuc<sub>SO-End</sub> and Nuc<sub>SO-Dyad</sub> in the absence or presence of Oct4 under different salt conditions.

(F) Average residence times of Oct4 on Nuc<sub>SO-End</sub> and Nuc<sub>SO-Dyad</sub> under different salt conditions.

Data are represented as mean  $\pm$  SD.



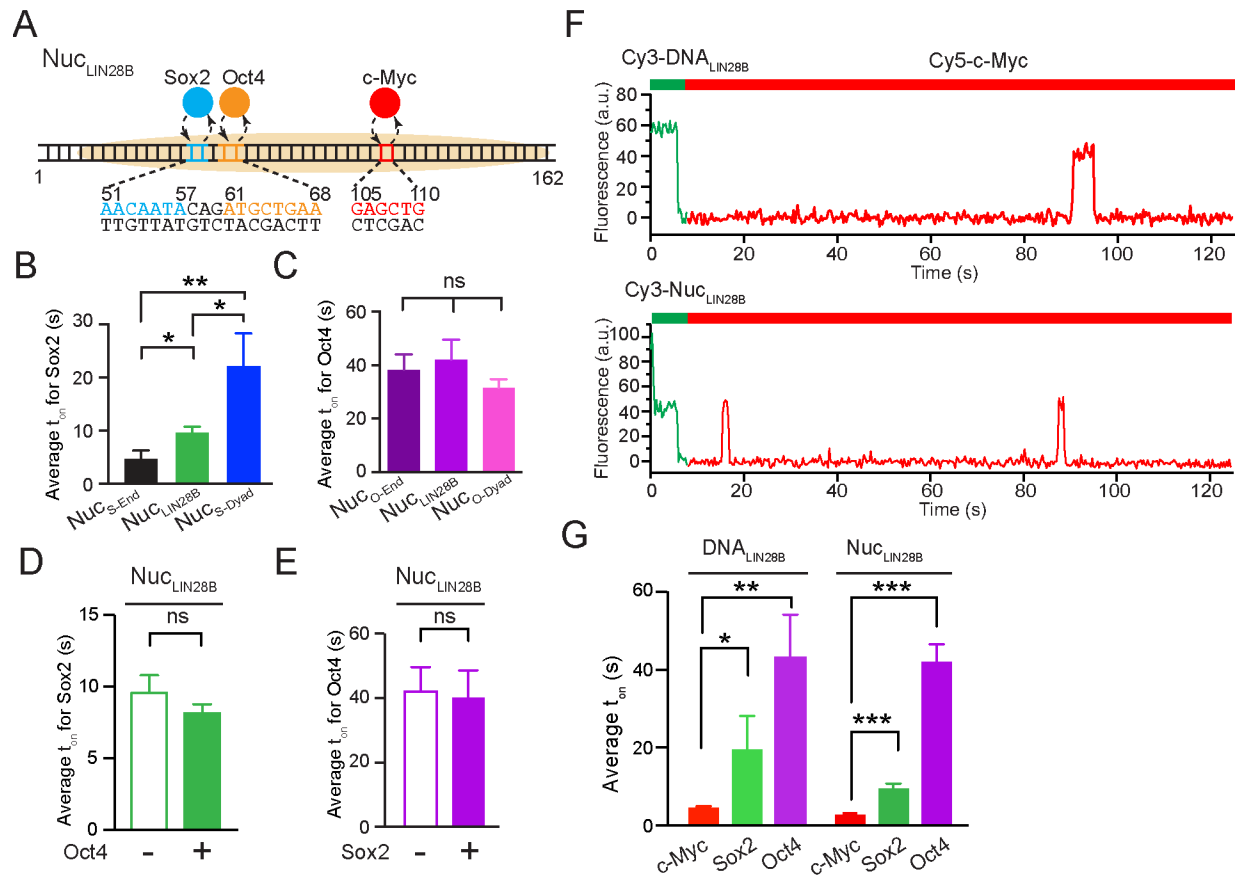

**Figure S6. Pluripotency TFs Exhibit Distinct Binding Behaviors at a Native Genomic Locus, Related to Figures 4, 5, and 6**

(A) Diagram of the *LIN28B* genomic locus. Positions of the predicted Sox2, Oct4, and c-Myc binding sites are indicated. The putative Sox2 and Oct4 sites are oppositely oriented.

(B) Average residence times of Sox2 on nucleosome substrates with differentially positioned Sox2 binding motifs.

(C) Average residence times of Oct4 on nucleosome substrates with differentially positioned Oct4 binding motifs.

(D) Average residence time of Sox2 on Nuc<sub>LIN28B</sub> in the absence or presence of Oct4.

(E) Average residence time of Oct4 on Nuc<sub>LIN28B</sub> in the absence or presence of Sox2.

(F) Representative fluorescence-time trajectories showing Cy5-labeled c-Myc:Max binding to Cy3-labeled DNA<sub>LIN28B</sub> and Nuc<sub>LIN28B</sub>.

(G) Comparison of the average residence time of c-Myc, Sox2, and Oct4 on DNA<sub>LIN28B</sub> (left) and Nuc<sub>LIN28B</sub> (right).

Data are represented as mean  $\pm$  SD.

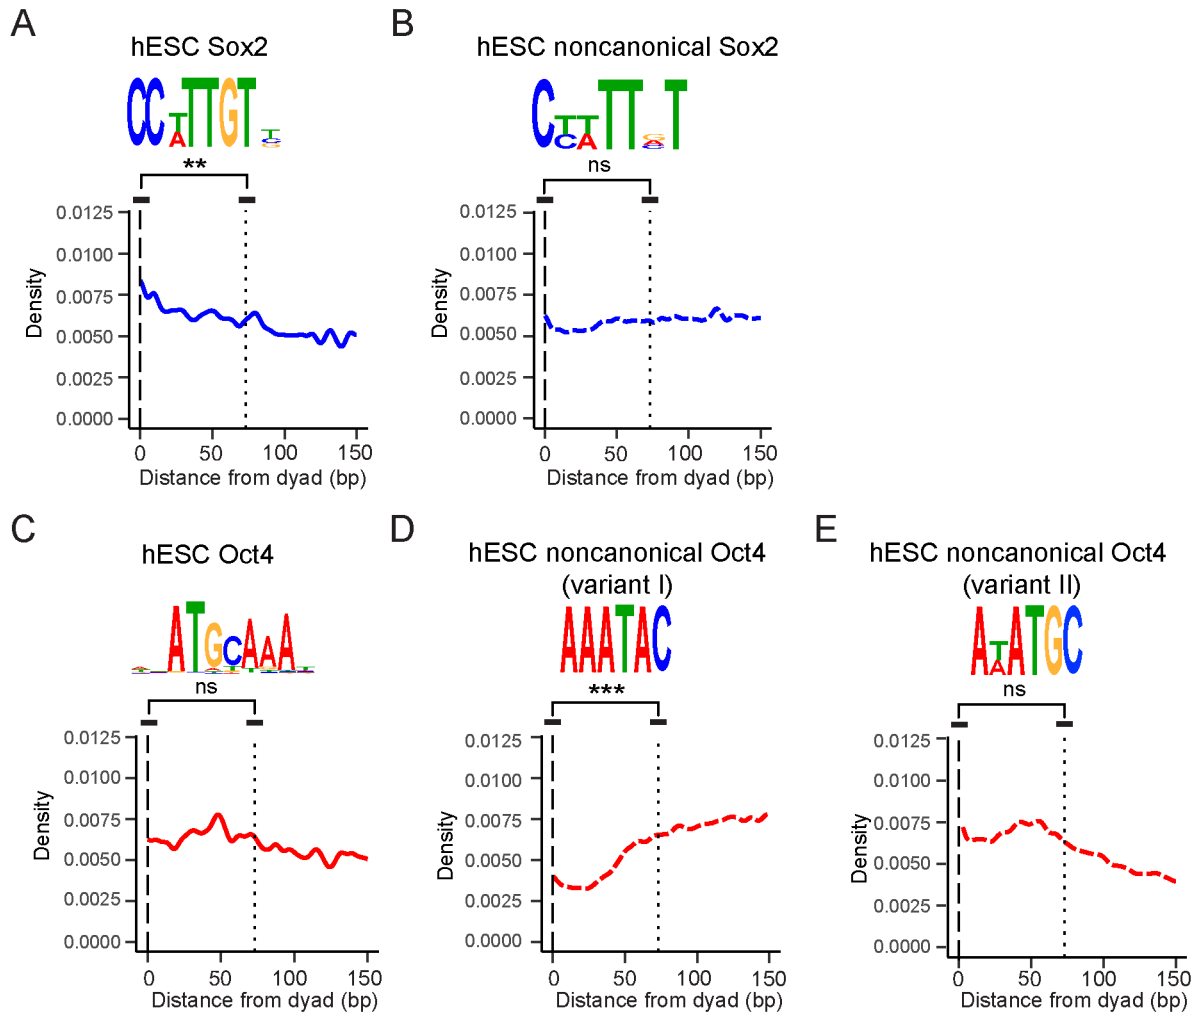

**Figure S7. Analysis of Sox2 and Oct4 Binding Preference in Human Embryonic Stem Cells, Related to Figure 7**

(A) Sequence logo of the canonical Sox2 binding motif (top) and smoothed (3-bp filter) distribution of the distance between a canonical Sox2 binding site and the nearest nucleosome dyad (bottom) in hESCs ( $N = 2,909$ ). Position 0 (dashed line) corresponds to the dyad; the dotted line approximates the edges of the nucleosome. Displayed significance is from  $t$ -test conducted between a 13-bp window centered at the dyad and a 13-bp window inside the nucleosome edge ( $P = 0.0040$ ).

(B) Same as (A), except for analyzing noncanonical Sox2 motifs ( $N = 9,264$ ;  $P = 0.66$ ).

(C) Same as (A), except for analyzing canonical Oct4 binding motifs ( $N = 5,455$ ;  $P = 0.50$ ).

(D) Same as (C), except for analyzing noncanonical Oct4 motifs (variant I) resembling one half of the canonical octameric Oct4 motif ( $N = 20,698$ ;  $P = 4.0 \times 10^{-8}$ ).

(E) Same as (C), except for analyzing noncanonical Oct4 motifs (variant II) resembling the other half of the canonical octameric Oct4 motif ( $N = 31,367$ ;  $P = 0.51$ ).

**Table S1.** Oligonucleotides used in this work. Related to STAR Methods

| Oligonucleotides (TF binding motifs in bold)                                                                                                                         | Source     |
|----------------------------------------------------------------------------------------------------------------------------------------------------------------------|------------|
| 601 DNA <sub>S-End</sub>                                                                                                                                             | This paper |
| <b>CTTTGTT</b> ATCCCGGTGCCGAGGCCGCTCAATTGGTCGTAGACAGCTCTAGCACCGCTTAAACGCACGTAC<br>GCGCTGTCCCCCGGTTTTAACCGCCAAGGGGATTACTCCCTAGTCTCCAGGCACGTGTCAGATATATAC<br>ATCCTGT   |            |
| 601 DNA <sub>S-End+7</sub>                                                                                                                                           | This paper |
| CTGGAGAC <b>CTTTGTTT</b> GCCGAGGCCGCTCAATTGGTCGTAGACAGCTCTAGCACCGCTTAAACGCACGTAC<br>GCGCTGTCCCCCGGTTTTAACCGCCAAGGGGATTACTCCCTAGTCTCCAGGCACGTGTCAGATATATAC<br>ATCCTGT |            |
| 601 DNA <sub>S-Dyad</sub>                                                                                                                                            | This paper |
| CTGGAGAATCCCGGTGCCGAGGCCGCTCAATTGGTCGTAGACAGCTCTAGCACCGCTTAAACGCACGTAC<br><b>GCTTTGTT</b> CCCCCGGTTTTAACCGCCAAGGGGATTACTCCCTAGTCTCCAGGCACGTGTCAGATATATAC<br>ATCCTGT  |            |
| 601 DNA <sub>S-Dyad+3</sub>                                                                                                                                          | This paper |
| CTGGAGAATCCCGGTGCCGAGGCCGCTCAATTGGTCGTAGACAGCTCTAGCACCGCTTAAACGCACGTAC<br>GCGC <b>CTTTGTT</b> CGCGTTTTAACCGCCAAGGGGATTACTCCCTAGTCTCCAGGCACGTGTCAGATATATAC<br>ATCCTGT |            |
| 601 DNA <sub>S-Dyad+6</sub>                                                                                                                                          | This paper |
| CTGGAGAATCCCGGTGCCGAGGCCGCTCAATTGGTCGTAGACAGCTCTAGCACCGCTTAAACGCACGTAC<br>GCGCTGT <b>CTTTGTT</b> TTTTAACCGCCAAGGGGATTACTCCCTAGTCTCCAGGCACGTGTCAGATATATAC<br>ATCCTGT  |            |
| 601 DNA <sub>S-Dyad-2</sub>                                                                                                                                          | This paper |
| CTGGAGAATCCCGGTGCCGAGGCCGCTCAATTGGTCGTAGACAGCTCTAGCACCGCTTAAACGCACGTAC<br><b>TTTGTT</b> CCCCCGGTTTTAACCGCCAAGGGGATTACTCCCTAGTCTCCAGGCACGTGTCAGATATATAC<br>ATCCTGT    |            |
| 601 DNA <sub>Rev-S-Dyad</sub>                                                                                                                                        | This paper |
| CTGGAGAATCCCGGTGCCGAGGCCGCTCAATTGGTCGTAGACAGCTCTAGCACCGCTTAAACGCACGTAC<br><b>GAACAAAG</b> CCCCCGGTTTTAACCGCCAAGGGGATTACTCCCTAGTCTCCAGGCACGTGTCAGATATATAC<br>ATCCTGT  |            |
| 601 DNA <sub>O-End</sub>                                                                                                                                             | This paper |
| CTGGAGAAT <b>GCATCT</b> GCCGAGGCCGCTCAATTGGTCGTAGACAGCTCTAGCACCGCTTAAACGCACGTAC<br>GCGCTGTCCCCCGGTTTTAACCGCCAAGGGGATTACTCCCTAGTCTCCAGGCACGTGTCAGATATATAC<br>ATCCTGT  |            |
| 601 DNA <sub>O-Dyad</sub>                                                                                                                                            | This paper |
| CTGGAGAATCCCGGTGCCGAGGCCGCTCAATTGGTCGTAGACAGCTCTAGCACCGCTTAAACGCACGTAC<br>GCGCTGT <b>CATGCATCT</b> TTAACCGCCAAGGGGATTACTCCCTAGTCTCCAGGCACGTGTCAGATATATAC<br>ATCCTGT  |            |
| 601 DNA <sub>Rev-O-Dyad</sub>                                                                                                                                        | This paper |
| CTGGAGAATCCCGGTGCCGAGGCCGCTCAATTGGTCGTAGACAGCTCTAGCACCGCTTAAACGCACGTAC<br>GCGCTGT <b>CAGATGCAT</b> TTAACCGCCAAGGGGATTACTCCCTAGTCTCCAGGCACGTGTCAGATATATAC<br>ATCCTGT  |            |
| 601 DNA <sub>SO-End</sub>                                                                                                                                            | This paper |
| <b>CTTTGTTATGCATCT</b> GCCGAGGCCGCTCAATTGGTCGTAGACAGCTCTAGCACCGCTTAAACGCACGTA<br>CGCGCTGTCCCCCGGTTTTAACCGCCAAGGGGATTACTCCCTAGTCTCCAGGCACGTGTCAGATATATAC<br>ATCCTGT   |            |
| 601 DNA <sub>Rev-SO-End</sub>                                                                                                                                        | This paper |
| <b>AACAAAGATGCATCT</b> GCCGAGGCCGCTCAATTGGTCGTAGACAGCTCTAGCACCGCTTAAACGCACGTA<br>CGCGCTGTCCCCCGGTTTTAACCGCCAAGGGGATTACTCCCTAGTCTCCAGGCACGTGTCAGATATATAC<br>ATCCTGT   |            |
| 601 DNA <sub>SO+3-End</sub>                                                                                                                                          | This paper |
| <b>CTTTGTTTGGATGCATCT</b> GAGGCCGCTCAATTGGTCGTAGACAGCTCTAGCACCGCTTAAACGCACGTA<br>CGCGCTGTCCCCCGGTTTTAACCGCCAAGGGGATTACTCCCTAGTCTCCAGGCACGTGTCAGATATATAC<br>ATCCTGT   |            |
| 601 DNA <sub>Rev-SO+3-End</sub>                                                                                                                                      | This paper |

|                                                                                                                                                                                     |            |
|-------------------------------------------------------------------------------------------------------------------------------------------------------------------------------------|------------|
| <b>AACAAGTGGATGCATCTGAGGCCGCTCAATTGGTCGTAGACAGCTCTAGCACCGCTTAAACGCACGTA<br/>CGCGCTGTCCCCCGCTTTTAACCGCCAAGGGGATTACTCCCTAGTCTCCAGGCACGTGTCAGATATATAC<br/>ATCCTGT</b>                  |            |
| 601 DNA <sub>SO-Dyad</sub>                                                                                                                                                          | This paper |
| <b>CTGGAGAATCCCGGTGCCGAGGCCGCTCAATTGGTCGTAGACAGCTCTAGCACCGCTTAAACGCACGTAC<br/>GCTTTGTTATGCATCTTTTAACCGCCAAGGGGATTACTCCCTAGTCTCCAGGCACGTGTCAGATATATA<br/>CATCCTGT</b>                |            |
| 601 DNA <sub>SO+3-Dyad</sub>                                                                                                                                                        | This paper |
| <b>CTGGAGAATCCCGGTGCCGAGGCCGCTCAATTGGTCGTAGACAGCTCTAGCACCGCTTAAACGCACGTAC<br/>GCTTTGTTTGGATGCATCTAACCGCCAAGGGGATTACTCCCTAGTCTCCAGGCACGTGTCACATATATA<br/>CATCCTGT</b>                |            |
| DNA <sub>lin28B</sub>                                                                                                                                                               | This paper |
| <b>AGTGGTATTAACATATCCTCAGTGGTGAGTATTAACATGGAACCTACTCCAACAATACAGATGCTGAAT<br/>AAATGTAGTCTAAGTGAAGGAAGAAGGAAAGGTGGGAGCTGCCATCACTCAGAATTGTCCAGCAGGGAT<br/>TGTGCAAGCTTGTGAATAAAGACA</b> |            |
| Biotin-601-F                                                                                                                                                                        | IDT        |
| /5Biosg/TACCGAACGTTCAACGATGATGCCGGAT                                                                                                                                                |            |
| AmC6-601-R                                                                                                                                                                          | IDT        |
| /5AmMC6/TACGCGAATCCAAGCGACACCGGCACT                                                                                                                                                 |            |
| Biotin-lin28B-F                                                                                                                                                                     | IDT        |
| /5Biosg/AGTGGTATTAACATATCCTCAGTGGTG                                                                                                                                                 |            |
| AmC6-lin28B-R                                                                                                                                                                       | IDT        |
| /5AmMC6/TGTCTTATTACAAGCTTGACAAA                                                                                                                                                     |            |
| H2B T49C mutant-F                                                                                                                                                                   | IDT        |
| GATTGCGGCATCTCGTCCAAGGCCATG                                                                                                                                                         |            |
| H2B T49C mutant-R                                                                                                                                                                   | IDT        |
| GGGGTGCACCTGCTTACGACCTTG                                                                                                                                                            |            |
| Sox2-F                                                                                                                                                                              | IDT        |
| GGAATCCATATGTACAACATGATGGAGACG                                                                                                                                                      |            |
| Sox2-R                                                                                                                                                                              | IDT        |
| CCGCTCGAGTCACATGTGTGAGAGGGGC                                                                                                                                                        |            |
| Oct4-F                                                                                                                                                                              | IDT        |
| GGAATCCATATGGCGGGACACCTGGCTTCG                                                                                                                                                      |            |
| Oct4-R                                                                                                                                                                              | IDT        |
| GCCGACGTCGACTCAGTTTGAATGCATGGGAG                                                                                                                                                    |            |
| Oct4 with C-terminal Sfp tag-F                                                                                                                                                      | IDT        |
| CTACTACGACTACTAAACTGAGTCGAGCACCACCACC                                                                                                                                               |            |
| Oct4 with C-terminal Sfp tag-R                                                                                                                                                      | IDT        |
| CCATGATAGTGAGTCTCCGTTTGAATGCATGGGAGAGCCC                                                                                                                                            |            |
| c-Myc-F                                                                                                                                                                             | IDT        |
| GGAATCCATATGCTGGATTTTTTCGGGTAG                                                                                                                                                      |            |
| c-Myc-R                                                                                                                                                                             | IDT        |
| CCGCTCGAGTTACGCACAAGAGTTCCGTAG                                                                                                                                                      |            |
| c-Myc with C-terminal Sfp tag-F                                                                                                                                                     | IDT        |
| CTATCATGGCTACTACGACTACTAACTAACTCGAGCACCACCACCAC                                                                                                                                     |            |
| c-Myc with C-terminal Sfp tag-R                                                                                                                                                     | IDT        |
| TCGTAGTAGCCATGATAGTGAGTCTCCCGCACAAGAGTTCCGTAGCTGTTCC                                                                                                                                |            |
| Max-F                                                                                                                                                                               | IDT        |
| GGAATCCATATGAGCGATAACGATGACATCGAGG                                                                                                                                                  |            |
| Max-R                                                                                                                                                                               | IDT        |
| CCGCTCGAGTTAGCTGGCCTCCATCCGGAG                                                                                                                                                      |            |
